# Supplementary material
Source: Research Square preprint supplement (doi:10.21203/rs.3.rs-9486639/v1)
Supplement: Supplementary file 1 [file 53bc68ca870ca7c4922822cc.docx]

**Supplementary information**

**Hybrid PEO–hydrothermal–silane coating with synergistic Ce–8HQ inhibitor sealing for durable corrosion protection of AZ31 magnesium alloy**

Majid Shahsanaei a, c, Nastaran Farahbakhsh a, Masoud Atapour b, Morteza Shamanian b, Benjamin Butz c, Christian Pritzel a, and Manuela S. Killian a*

a) Chemistry and Structure of novel Materials, Department of Chemistry and Biology, University of Siegen, Paul-Bonatz-Str. 9-11, 57076 Siegen, Germany

b) Department of Materials Engineering, Isfahan University of Technology, Isfahan 84156-83111, Iran

c) Micro- and Nano Analytics Group, University of Siegen, Adolf-Reichwein-Straße 28, 57076 Siegen, Germany

* Corresponding author, Email: Manuela Killian, [manuela.killian@uni-siegen.de](mailto:manuela.killian@uni-siegen.de)


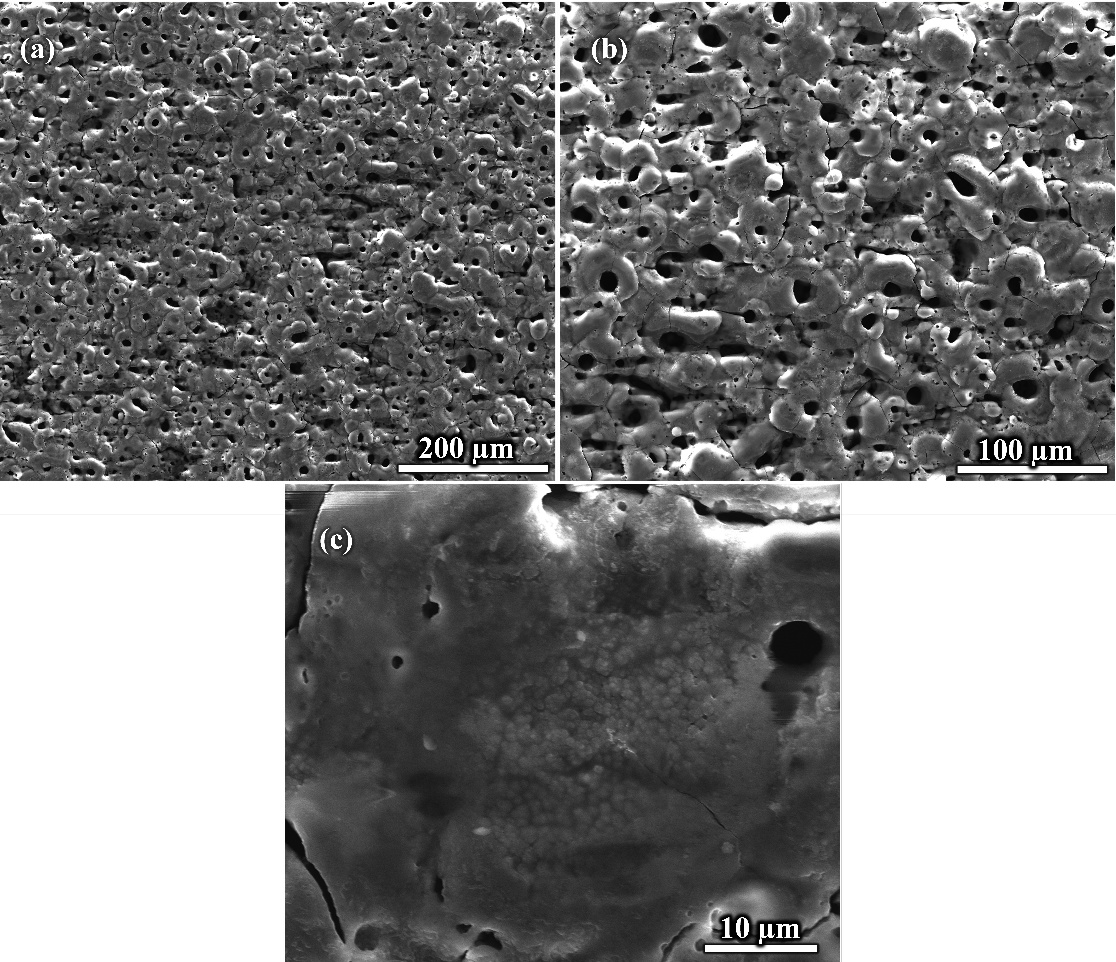


Figure S 1: SEM images of PEO coatings at different magnifications. The images clearly show cracks and pores formed during plasma electrolytic oxidation.


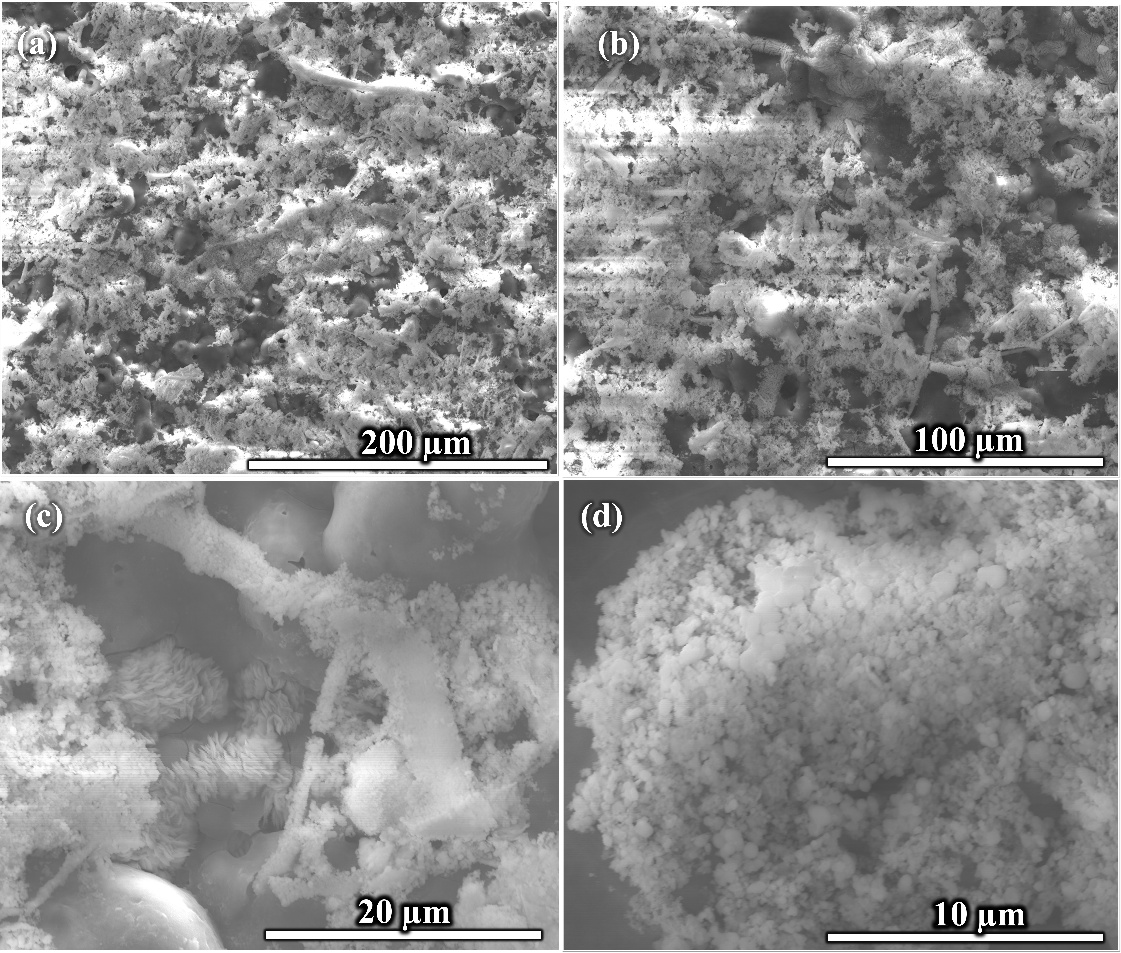


Figure S 2: SEM images of PEO/HT coatings at different magnifications, showing that cracks and pores are effectively sealed by Ce-based components.


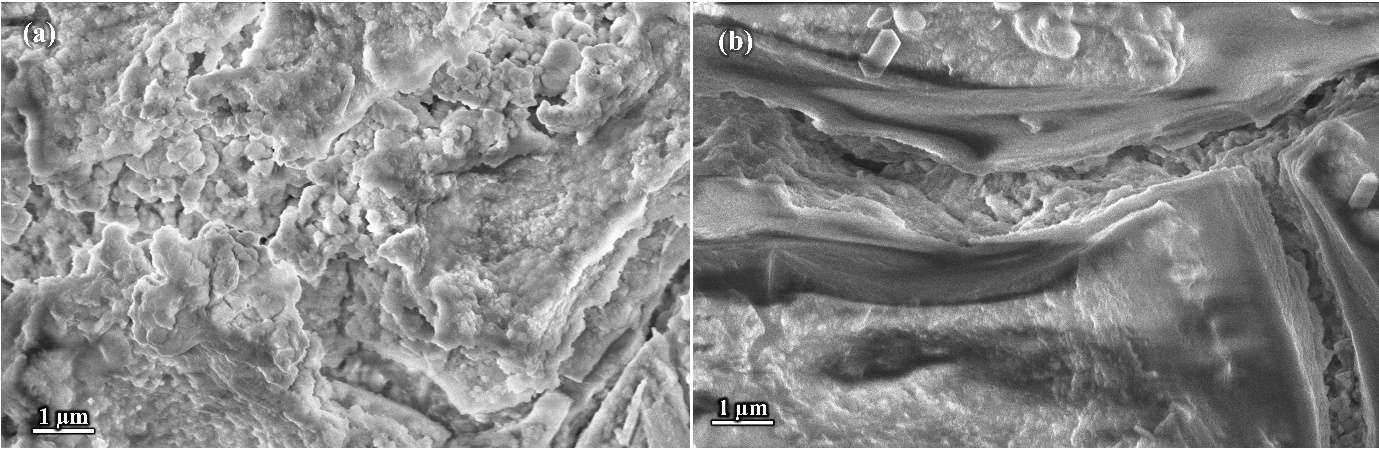


Figure S 3: SEM images of (a) PEO/HT/Silane and (b) PEO/HT/Silane+8HQ show that the surface is covered with a silane layer.


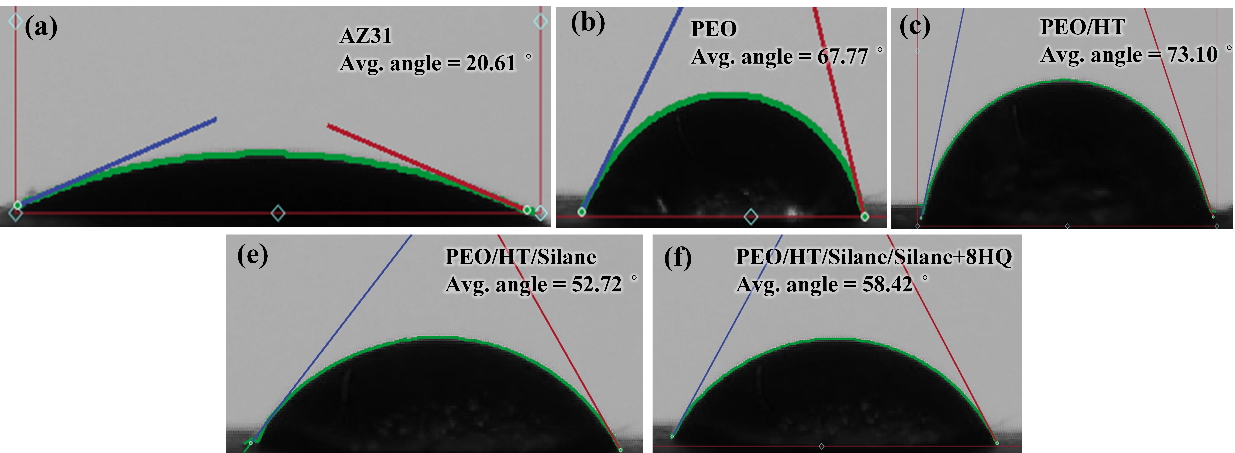


Figure S 4: Water contact angle measurements of various samples: (a) AZ31 magnesium, (b) PEO, (c) PEO/HT, (d) PEO/HT/Silane, and (e) PEO/HT/Silane+8HQ.


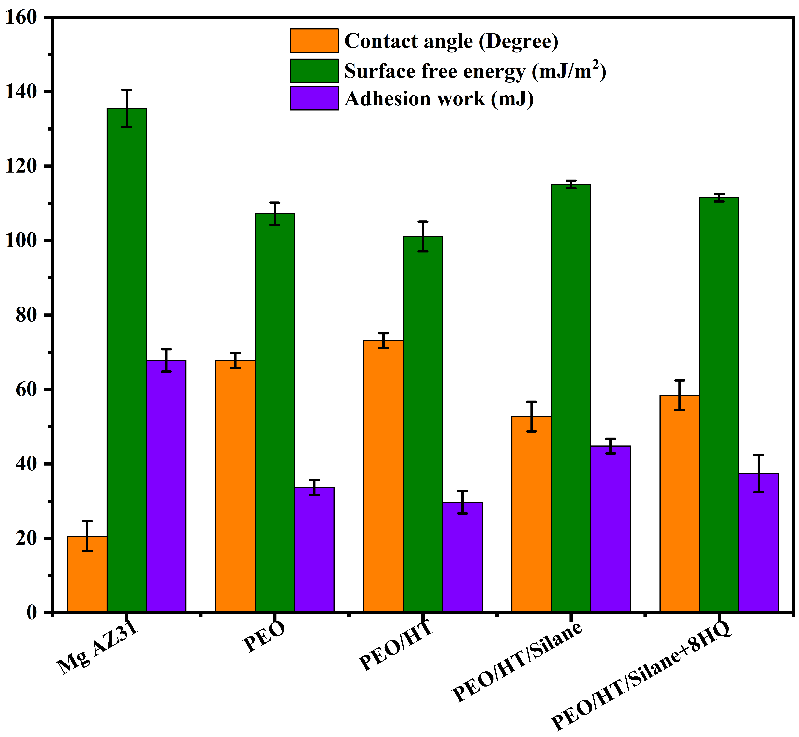


Figure S 5: Parameters calculated using the Young’s equation and Neumann equation, including work of adhesion, surface free energy, and water contact angle for different samples.


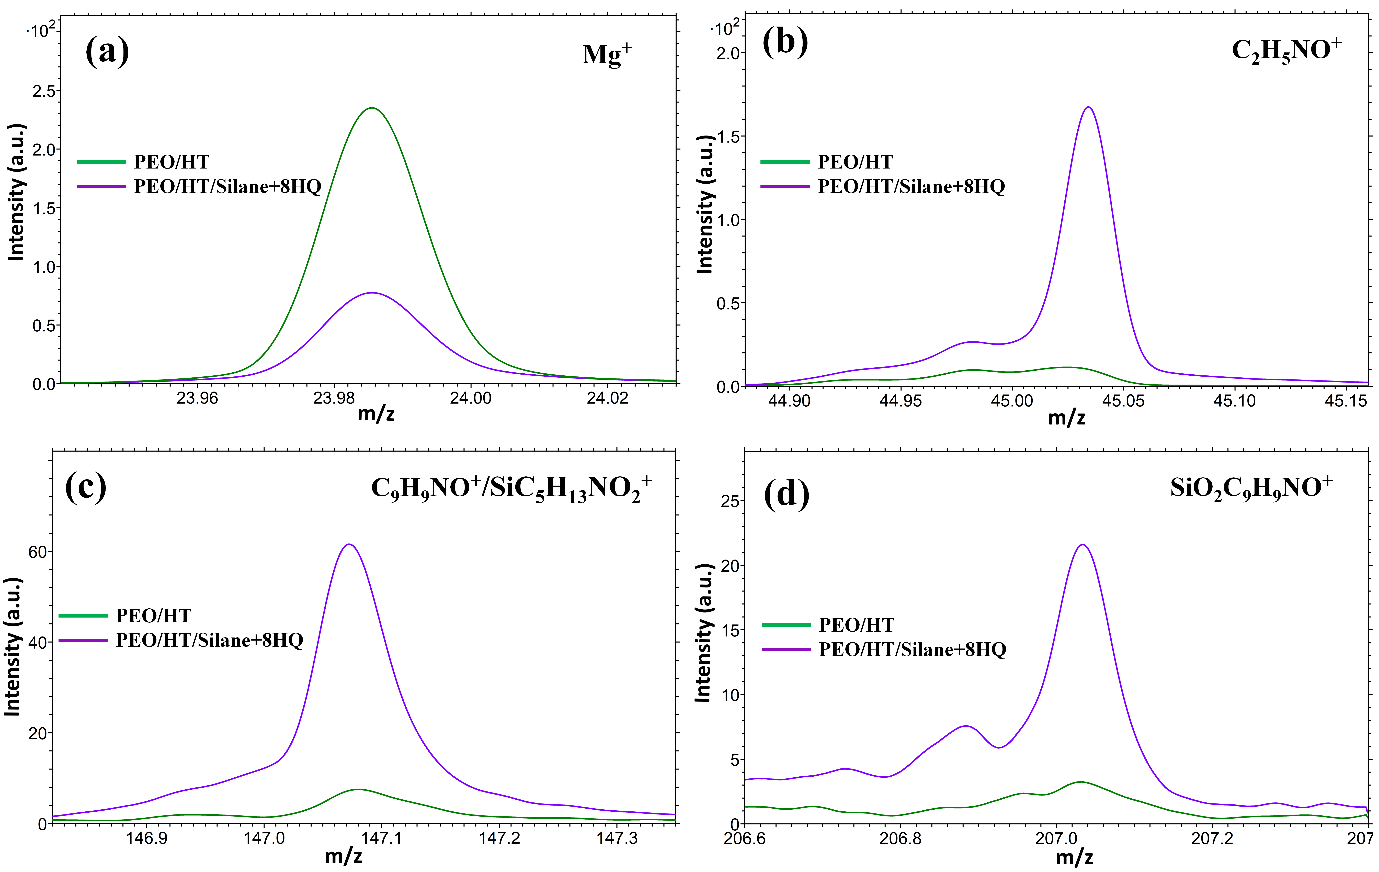


Figure S 6: Positive ToF-SIMS signals of molecular fragments: (a) Mg+, (b) C2H5NO+, (c) C9H9NO+/ SiC5H13NO2+, and (d) SiO2C9H9NO+ for PEO/HT and PEO/HT/silane+8HQ samples.

Table S 1: Peak list applied for PCA of positive-ion ToF-SIMS spectra from PEO/HT and PEO/HT/silane+8HQ samples. Fragment assignments were obtained from the corresponding loading plot shown in Figure 5e.

| m/z | Ion |
| --- | --- |
| 15.02 | CH3+ |
| 23.98 | Mg+ |
| 27.97 | Si+ |
| 40.99 | MgOH+ |
| 41.03 | C3H5+ |
| 44.02 | C2H4O+ |
| 45.03 | CH3NO+ |
| 58.03 | C2H4NO+ |
| 59.03 | C2H5NO+ |
| 73.04 | SiC2H5O+ |
| 87.04 | SiC2H5NO+ |
| 91.02 | NaC5H8+ |
| 139.91 | Ce+ |
| 140.91 | Na2PO4+ |
| 147.09 | C9H9NO+/SiC5H13NO2+ |
| 155.91 | CeO+ |
| 156.92 | CeOH+ |
| 207.03 | SiO2C9H9NO+ |
